# Supplementary material for: Seroprevalence, Direct Detection and Risk Factors for Toxoplasma gondii Infection in Pigs in Serbia, and Influence of Biosecurity Measures
Source: MDPI journal article supplement (doi:10.3390/microorganisms10051069), 2022-05-23
Supplement: s1 [file s1]

**Table S1.** *Toxoplasma gondii*-specific antibodies in all sampled pigs (N = 825) according to independent variables. Results of univariate logistic regression analysis; individual pigs as units of analysis. N - number examined, CI - confidence interval, OR - odds ratio; \*pigs from pig traders' operations

| Factor                                       | N          | Prevalence (%) | 95% CI           | OR    | 95% CI       | P value           |
|----------------------------------------------|------------|----------------|------------------|-------|--------------|-------------------|
| <b>Age group</b>                             |            |                |                  |       |              | <b>&lt;0.0001</b> |
| Market-weight (< 8 months)                   | 786        | 15.1           | 12.7-17.8        |       |              |                   |
| Adult/sows (≥ 8 months)                      | 39         | 43.6           | 27.8-60.4        | 4.331 | 2.233-8.399  |                   |
| <b>Type of husbandry</b>                     |            |                |                  |       |              | 0.794             |
| Farm                                         | 616        | 16.4           | 13.6-19.6        |       |              |                   |
| Backyard                                     | 124        | 15.3           | 9.5-22.9         | 0.923 | 0.541-1.573  |                   |
| Unspecified*                                 | 85         | 18.8           | 11.2-28.8        | 1.182 | 0.659-2.121  |                   |
| <b>Herd size</b>                             |            |                |                  |       |              | 0.756             |
| Large (>500)                                 | 511        | 16.6           | 13.5-20.1        |       |              |                   |
| Medium (150-500)                             | 110        | 17.3           | 10.7-25.6        | 1.046 | 0.606-1.807  |                   |
| Small (<150)                                 | 119        | 13.4           | 7.9-20.9         | 0.779 | 0.438-1.385  |                   |
| Unspecified*                                 | 85         | 18.8           | 11.2-28.8        | 1.162 | 0.643-2.100  |                   |
| <b>Farm type</b>                             |            |                |                  |       |              | 0.478             |
| Farrow-to-finish                             | 576        | 15.5           | 13.6-18.7        |       |              |                   |
| Smallholders' finishing                      | 164        | 18.9           | 13.2-25.7        | 1.275 | 0.812-2.003  |                   |
| Unspecified*                                 | 85         | 18.8           | 11.2-28.8        | 1.269 | 0.704-2.286  |                   |
| <b>Worker training</b>                       |            |                |                  |       |              | 0.337             |
| No                                           | 597        | 17.3           | 14.3-20.5        |       |              |                   |
| Yes                                          | 228        | 14.3           | 10.2-19.7        | 0.822 | 0.530-1.242  |                   |
| <b>Water treatment and control</b>           |            |                |                  |       |              | 0.555             |
| No                                           | 577        | 17.0           | 14.0-20.3        |       |              |                   |
| Yes                                          | 248        | 15.3           | 11.1-20.4        | 0.884 | 0.588-1.330  |                   |
| <b>Disinfection barrier at farm entrance</b> |            |                |                  |       |              | 0.971             |
| Yes                                          | 472        | 16.5           | 13.3-20.2        |       |              |                   |
| No                                           | 353        | 16.4           | 12.7-20.7        | 1.007 | 0.694-1.460  |                   |
| <b>Rodent control</b>                        |            |                |                  |       |              | <b>0.029</b>      |
| Professional                                 | 82         | 4.9            | 1.3-12.0         |       |              |                   |
| Professional and self-implemented            | 190        | 20.5           | 15.0-27.0        | 5.036 | 1.737-14.605 |                   |
| Self-implemented                             | 284        | 17.3           | 13.0-22.2        | 4.066 | 1.422-11.629 |                   |
| None performed                               | 269        | 16.4           | 12.1-21.3        | 3.813 | 1.327-10.957 |                   |
| <b>Region</b>                                |            |                |                  |       |              | 0.189             |
| Northern Serbia                              | 520        | 16.3           | 13.3-19.8        |       |              |                   |
| Western Serbia                               | 151        | 15.2           | 9.9-22.0         | 0.920 | 0.557-1.518  |                   |
| Central & South-Eastern Serbia               | 114        | 21.9           | 14.7-30.6        | 1.438 | 0.871-2.372  |                   |
| Belgrade District                            | 40         | 7.5            | 1.6-20.4         | 0.415 | 0.125-1.377  |                   |
| <b>TOTAL</b>                                 | <b>825</b> | <b>16.5</b>    | <b>14.0-19.0</b> |       |              |                   |

**Table S2.** *Toxoplasma gondii*-specific antibodies in pigs (N = 581, with complete biosecurity questionnaires only) according to independent variables. Results of univariate logistic regression analysis; individual pigs as units of analysis. N - number examined, CI - confidence interval, OR - odds ratio

| Factor                     | N   | Prevalence (%) | 95% CI    | OR    | 95% CI      | P value           |
|----------------------------|-----|----------------|-----------|-------|-------------|-------------------|
| <b>Age group</b>           |     |                |           |       |             | <b>&lt;0.0001</b> |
| Market-weight (< 8 months) | 542 | 14.4           | 11.5-17.6 |       |             |                   |
| Adult/sows (≥ 8 months)    | 39  | 43.6           | 27.8-60.4 | 4.579 | 2.336-9.045 |                   |
| <b>Type of husbandry</b>   |     |                |           |       |             | 0.704             |
| Farm                       | 526 | 16.5           | 13.7-20.0 |       |             |                   |
| Backyard                   | 55  | 14.8           | 6.5-26.7  | 0.859 | 0.392-1.881 |                   |

|                                              |     |      |           |       |              |                   |
|----------------------------------------------|-----|------|-----------|-------|--------------|-------------------|
| <b>Herd size</b>                             |     |      |           |       |              | 0.523             |
| Large (>500)                                 | 471 | 17.2 | 13.9-20.9 |       |              |                   |
| Medium (150-500)                             | 70  | 12.9 | 6.0-23.0  | 0.710 | 0.339-1.488  |                   |
| Small (<150)                                 | 40  | 12.5 | 4.2-26.8  | 0.688 | 0.261-1.809  |                   |
| <b>Farm type</b>                             |     |      |           |       |              | <b>0.108</b>      |
| Farrow-to-finish                             | 496 | 15.3 | 12.3-18.8 |       |              |                   |
| Smallholders' finishing                      | 85  | 22.4 | 14.0-23.7 | 1.591 | 0.904-2.801  |                   |
| <b>Worker training</b>                       |     |      |           |       |              | 0.323             |
| No                                           | 353 | 17.6 | 13.7-21.9 |       |              |                   |
| Yes                                          | 228 | 14.5 | 10.2-19.7 | 0.794 | 0.502-1.258  |                   |
| <b>Work clothes</b>                          |     |      |           |       |              | 0.823             |
| Yes                                          | 516 | 16.5 | 13.4-20.0 |       |              |                   |
| No                                           | 65  | 15.4 | 7.6-26.5  | 0.922 | 0.452-1.880  |                   |
| <b>Multispecies farming</b>                  |     |      |           |       |              | <b>&lt;0.0001</b> |
| No                                           | 526 | 14.4 | 11.6-17.7 |       |              |                   |
| Yes                                          | 55  | 34.5 | 22.2-48.6 | 3.125 | 1.704-5.732  |                   |
| <b>Presence of cats</b>                      |     |      |           |       |              | 0.178             |
| No                                           | 330 | 14.5 | 10.9-18.8 |       |              |                   |
| Yes                                          | 251 | 18.7 | 14.1-24.1 | 1.354 | 0.871-2.103  |                   |
| <b>Presence of dogs</b>                      |     |      |           |       |              | 0.710             |
| Yes                                          | 419 | 16.7 | 10.2-21.9 |       |              |                   |
| No                                           | 162 | 15.4 | 13.3-20.6 | 0.910 | 0.553-1.496  |                   |
| <b>Presence of rodents</b>                   |     |      |           |       |              | <b>0.040</b>      |
| Yes                                          | 374 | 18.7 | 14.9-23.0 |       |              |                   |
| No                                           | 207 | 12.1 | 8.0-17.3  | 0.597 | 0.365-0.976  |                   |
| <b>Water supply</b>                          |     |      |           |       |              | 0.360             |
| Draw well                                    | 469 | 15.8 | 12.6-19.4 |       |              |                   |
| Public water mains                           | 50  | 14.0 | 5.8-26.7  | 0.869 | 0.376-2.006  |                   |
| Water mains and draw well                    | 62  | 22.6 | 12.9-35.0 | 1.557 | 0.817-2.967  |                   |
| <b>Water treatment and control</b>           |     |      |           |       |              | 0.563             |
| No                                           | 333 | 17.1 | 13.2-21.6 |       |              |                   |
| Yes                                          | 248 | 15.3 | 11.1-20.4 | 0.876 | 0.560-1.371  |                   |
| <b>Closed feeding system</b>                 |     |      |           |       |              | 0.262             |
| Yes                                          | 330 | 14.8 | 11.2-19.1 |       |              |                   |
| No                                           | 251 | 18.3 | 13.7-23.7 | 1.287 | 0.828-2.000  |                   |
| <b>Disinfection barrier at farm entrance</b> |     |      |           |       |              | 0.813             |
| Yes                                          | 472 | 16.5 | 13.3-20.2 |       |              |                   |
| No                                           | 109 | 15.6 | 9.4-23.8  | 0.933 | 0.527-1.653  |                   |
| <b>Disinfection boot-dips at each barn</b>   |     |      |           |       |              | <b>0.025</b>      |
| Yes                                          | 382 | 18.8 | 15.0-23.1 |       |              |                   |
| No                                           | 199 | 11.6 | 7.5-16.8  | 0.563 | 0.340-0.932  |                   |
| <b>Rodent control</b>                        |     |      |           |       |              | <b>0.025</b>      |
| Professional                                 | 82  | 4.9  | 1.3-12.0  |       |              |                   |
| Professional and self-implemented            | 190 | 20.5 | 15.0-27.0 | 5.036 | 1.737-14.605 |                   |
| Self-implemented                             | 284 | 17.3 | 13.0-22.2 | 4.066 | 1.422-11.629 |                   |
| None performed                               | 25  | 12.0 | 2.5-31.2  | 2.659 | 0.553-12.781 |                   |
| <b>Region</b>                                |     |      |           |       |              | <b>0.001</b>      |
| Northern Serbia                              | 441 | 14.1 | 10.9-17.7 |       |              |                   |
| Western Serbia                               | 35  | 31.4 | 16.7-49.1 | 2.802 | 1.307-6.006  |                   |
| Central & South-Eastern Serbia               | 65  | 29.2 | 18.6-41.8 | 2.525 | 1.388-4.592  |                   |
| Belgrade District                            | 40  | 7.5  | 1.6-20.4  | 0.496 | 0.148-1.657  |                   |
